# Supplementary material for: Direct conversion of urea into graphitic carbon nitride over mesoporous TiO2spheres under mild condition
Source: Royal Society of Chemistry journal article supplement (doi:10.1039/c0cc03530k), 2010-11-15
Supplement: c0cc03530k.pdf [file c0cc03530k.pdf]

## Electronic Supplementary Information (ESI)

### Direct conversion of urea into graphitic carbon nitride over mesoporous TiO<sub>2</sub> spheres under mild condition

**Xiao-Xin Zou,<sup>†,‡</sup> Guo-Dong Li,<sup>†</sup> Yu-Ning Wang,<sup>†,‡</sup> Jun Zhao,<sup>†</sup> Chang Yan,<sup>†</sup>  
Ming-Yi Guo,<sup>†</sup> Lu Li,<sup>†,‡</sup> Jie-Sheng Chen<sup>‡</sup>**

<sup>†</sup> State Key Laboratory of Inorganic Synthesis and Preparative Chemistry, College of Chemistry, Jilin University, Changchun 130012, China

<sup>‡</sup> School of Chemistry and Chemical Engineering, Shanghai Jiao Tong University, Shanghai 200240, China

E-mail: chemcj@sjtu.edu.cn

## Experimental Section

**Synthesis of titanium glycolate precursor:** The titanium glycolate precursor was prepared at room temperature by following the previously reported procedures.<sup>23</sup> Typically, the mixture of titanium *n*-butoxide (2 mL) and ethylene glycol (50 mL) was poured into a solution containing acetone (170 mL) and water (2.7 mL) and was stirred at room temperature to form the titanium glycolate precursor. After 1 h, the white precipitate was washed several times with ethanol and dried in an oven at 60 °C.

**Light-driven synthesis of mesoporous TiO<sub>2</sub> spheres:** The titanium glycolate precursor (4.0 g) was dispersed in water (400 mL) and then exposed to the UV-light irradiation for 2 h. After the irradiation, the solid sample was harvested and dried in air. The obtained product was the mesoporous TiO<sub>2</sub> spheres described in the title of this communication and was designated as TiO<sub>2</sub>-UV. The UV-light source used in the experiment was a 400 W high-pressure mercury lamp (main output at 313 nm).

**Control experiments:** a) The TiO<sub>2</sub>-1 sample was prepared by calcining the titanium glycolate precursor at 500 °C for 2 h.<sup>22</sup> b) The TiO<sub>2</sub>-2 sample was prepared through *in situ* hydrolysis of the titanium glycolate precursor at 100 °C for 2 h.<sup>23</sup>

**Formation of C<sub>3</sub>N<sub>4</sub> from urea:** The formation of C<sub>3</sub>N<sub>4</sub> from urea was achieved via heating the mixture of TiO<sub>2</sub>-UV (0.1 g) and urea (0.5-3 g) in air at about 300 °C for 2 h. To prepare pure C<sub>3</sub>N<sub>4</sub>, the resulting orange-tan powder was treated with HF (5.0 wt%) for 24 hours at room temperature to remove TiO<sub>2</sub>. Subsequently the sample was treated with HNO<sub>3</sub> acid (3 mol/L) at 80 °C for 1 h to remove the byproducts (cyanuric acid).

For comparison, control experiments were performed by replacing TiO<sub>2</sub>-UV with TiO<sub>2</sub>-1, TiO<sub>2</sub>-2, P25, MCM-41, SBA-15, or NaOH, while other reaction conditions were identical. These control experiments all failed to yield C<sub>3</sub>N<sub>4</sub>.

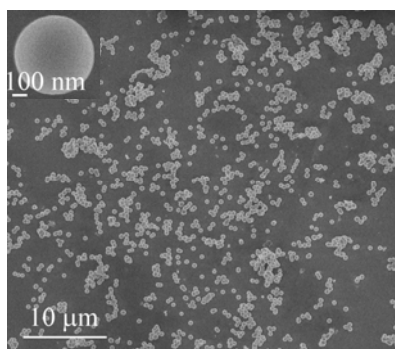

Figure S1. SEM images of the titanium glycolate precursor.

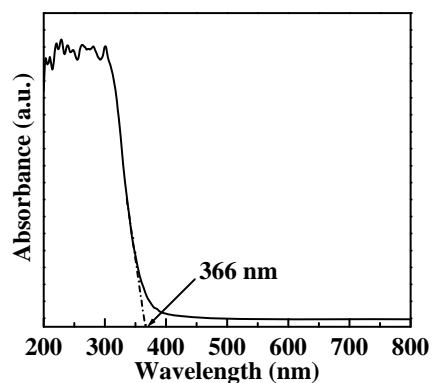

Figure S2. The UV/vis absorption spectrum of the titanium glycolate precursor obtained from the diffuse reflectance one through Kubelka-Munk transformation.

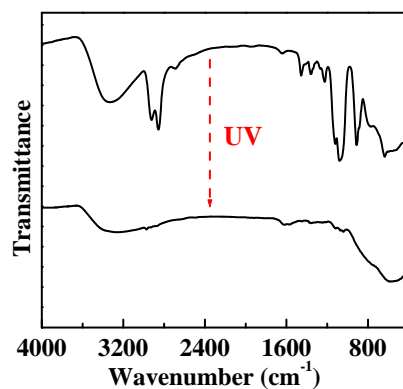

Figure S3. IR spectra of the titanium glycolate precursor before and after UV irradiation.

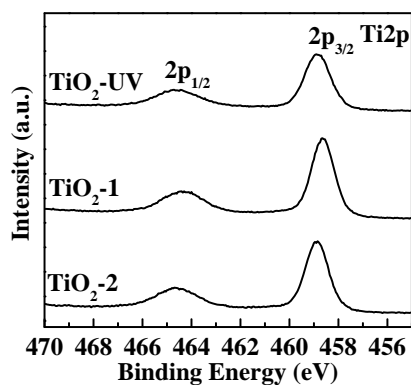

Figure S4. High-resolution XPS spectra of Ti2p for TiO<sub>2</sub>-UV, TiO<sub>2</sub>-1 and TiO<sub>2</sub>-2.

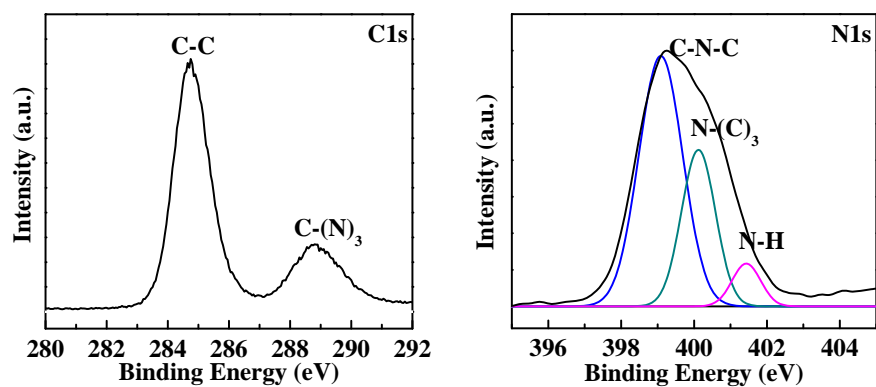

Figure S5. High-resolution XPS spectra of C1s (a) and N1s for the as-prepared C<sub>3</sub>N<sub>4</sub> sample. The peak at 284.8 eV in the C1s spectrum is due to adventitious elemental carbon from the XPS instrument itself.
